# Supplementary material for: Anti-inflammatory effect of Chrysanthemum zawadskii, peppermint, Glycyrrhiza glabra herbal mixture in lipopolysaccharide-stimulated RAW264.7 macrophages
Source: PubMed Central journal article supplement — Mol Med Rep. 2021 May 25;24(1):532. doi: 10.3892/mmr.2021.12171 (PMC8170225; doi:10.3892/mmr.2021.12171), 2021-05-25
Supplement: Supplementary_Data.pdf [file Supplementary_Data.pdf]

Figure S1. Effects of CPG on NO levels in LPS-stimulated RAW264.7 macrophages. RAW264.7 cells were treated with various extracts and stimulated with LPS for 16 h. Levels of NO in the culture supernatants were analyzed using a Griess assay. Data are presented as the mean  $\pm$  SD. All groups labeled with the same lower case letter (a-e) were not significantly different from each other ( $P>0.05$ ), whereas groups labeled with different lower case letters were significantly different ( $P<0.05$ ). CPG, mixture of *Chrysanthemum zawadskii*, peppermint and *Glycyrrhiza glabra*; C, *Chrysanthemum zawadskii*; P, peppermint; G, *Glycyrrhiza glabra*; NO, nitric oxide; LPS, lipopolysaccharide.

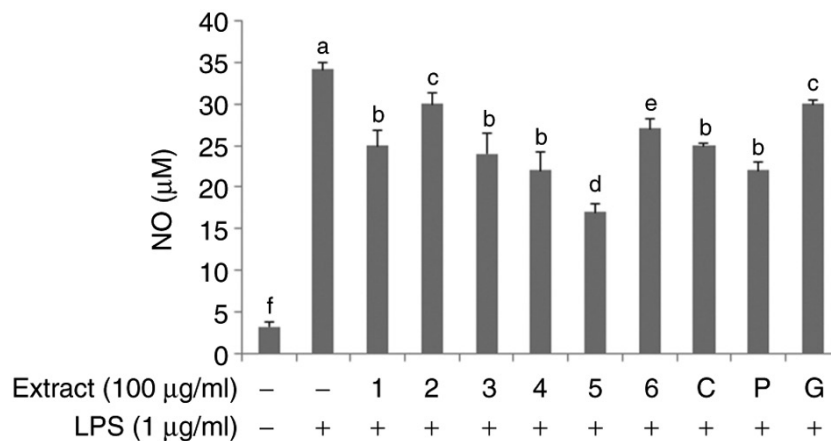

Figure S2. DPPH radical scavenging activity of CPG. A total of 0.1 ml of various extracts was mixed with 0.1 ml 0.3 mM DPPH solution and incubated at room temperature in the dark for 30 min. Data are presented as the mean  $\pm$  SD. All groups labeled with the same lower case letter (a-e) were not significantly different from each other ( $P>0.05$ ), whereas groups labeled with different lower case letters were significantly different ( $P<0.05$ ). CPG, mixture of *Chrysanthemum zawadskii*, peppermint and *Glycyrrhiza glabra*; C, *Chrysanthemum zawadskii*; P, peppermint; G, *Glycyrrhiza glabra*; DPPH, 1,1-diphenyl-2-picrylhydrazyl.

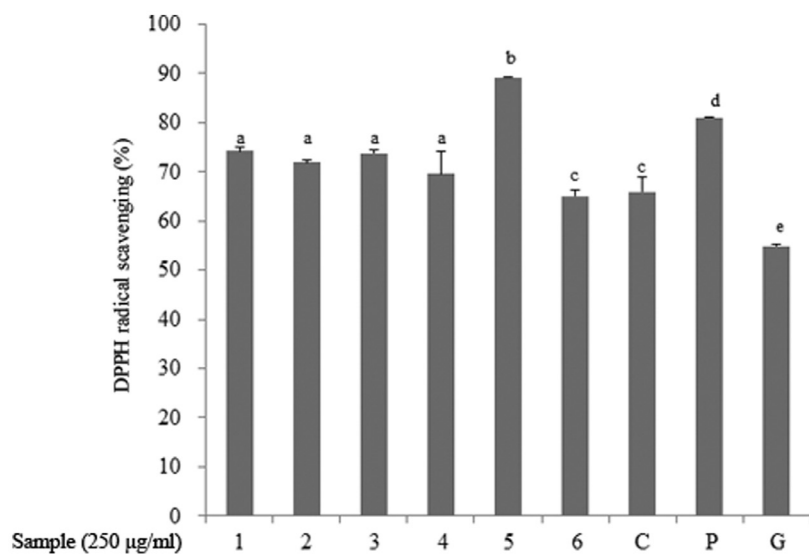

Table SI. Composition of the mixture of *Chrysanthemum zawadskii*, peppermint and *Glycyrrhiza glabra*.

| No. | Plant materials                    |               |                             |
|-----|------------------------------------|---------------|-----------------------------|
|     | <i>Chrysanthemum zawadskii</i> , % | Peppermint, % | <i>Glycyrrhiza glabra</i> % |
| 1   | 33.3                               | 33.3          | 33.3                        |
| 2   | 25.0                               | 25.0          | 50.0                        |
| 3   | 50.0                               | 25.0          | 25.0                        |
| 4   | 75.0                               | 10.0          | 15.0                        |
| 5   | 15.0                               | 75.0          | 10.0                        |
| 6   | 15.0                               | 10.0          | 75.0                        |
